# Supplementary material for: Effectiveness of a multimodal hand hygiene campaign and obstacles to success in Addis Ababa, Ethiopia
Source: PubMed Central journal article supplement (PMC4004416; doi:10.1186/2047-2994-3-8), 2014-03-17
Supplement: 2047-2994-3-8-S1.pdf [file 2047-2994-3-8-S1.pdf]

**Position Key:** 1-Faculty 2-Resident 3-Student  
4-Nurse 5-Other HCW 6-unknown

**Position Key:** 1-Faculty 2-Resident 3-Student  
4-Nurse 5-Other HCW 6-unknown

| Date:     |          |                                                                |                                                                                       |                                                       |
|-----------|----------|----------------------------------------------------------------|---------------------------------------------------------------------------------------|-------------------------------------------------------|
| Location: |          |                                                                |                                                                                       |                                                       |
| #         | Position | Indication                                                     | Action                                                                                | Rounds                                                |
| 1         |          | <input type="checkbox"/> Before <input type="checkbox"/> After | <input type="checkbox"/> HW <input type="checkbox"/> HR <input type="checkbox"/> None | <input type="checkbox"/> Y <input type="checkbox"/> N |
| 2         |          | <input type="checkbox"/> Before <input type="checkbox"/> After | <input type="checkbox"/> HW <input type="checkbox"/> HR <input type="checkbox"/> None | <input type="checkbox"/> Y <input type="checkbox"/> N |
| 3         |          | <input type="checkbox"/> Before <input type="checkbox"/> After | <input type="checkbox"/> HW <input type="checkbox"/> HR <input type="checkbox"/> None | <input type="checkbox"/> Y <input type="checkbox"/> N |
| 4         |          | <input type="checkbox"/> Before <input type="checkbox"/> After | <input type="checkbox"/> HW <input type="checkbox"/> HR <input type="checkbox"/> None | <input type="checkbox"/> Y <input type="checkbox"/> N |
| 5         |          | <input type="checkbox"/> Before <input type="checkbox"/> After | <input type="checkbox"/> HW <input type="checkbox"/> HR <input type="checkbox"/> None | <input type="checkbox"/> Y <input type="checkbox"/> N |
| 6         |          | <input type="checkbox"/> Before <input type="checkbox"/> After | <input type="checkbox"/> HW <input type="checkbox"/> HR <input type="checkbox"/> None | <input type="checkbox"/> Y <input type="checkbox"/> N |
| 7         |          | <input type="checkbox"/> Before <input type="checkbox"/> After | <input type="checkbox"/> HW <input type="checkbox"/> HR <input type="checkbox"/> None | <input type="checkbox"/> Y <input type="checkbox"/> N |
| 8         |          | <input type="checkbox"/> Before <input type="checkbox"/> After | <input type="checkbox"/> HW <input type="checkbox"/> HR <input type="checkbox"/> None | <input type="checkbox"/> Y <input type="checkbox"/> N |
| 9         |          | <input type="checkbox"/> Before <input type="checkbox"/> After | <input type="checkbox"/> HW <input type="checkbox"/> HR <input type="checkbox"/> None | <input type="checkbox"/> Y <input type="checkbox"/> N |
| 10        |          | <input type="checkbox"/> Before <input type="checkbox"/> After | <input type="checkbox"/> HW <input type="checkbox"/> HR <input type="checkbox"/> None | <input type="checkbox"/> Y <input type="checkbox"/> N |
| 11        |          | <input type="checkbox"/> Before <input type="checkbox"/> After | <input type="checkbox"/> HW <input type="checkbox"/> HR <input type="checkbox"/> None | <input type="checkbox"/> Y <input type="checkbox"/> N |
| 12        |          | <input type="checkbox"/> Before <input type="checkbox"/> After | <input type="checkbox"/> HW <input type="checkbox"/> HR <input type="checkbox"/> None | <input type="checkbox"/> Y <input type="checkbox"/> N |
| 13        |          | <input type="checkbox"/> Before <input type="checkbox"/> After | <input type="checkbox"/> HW <input type="checkbox"/> HR <input type="checkbox"/> None | <input type="checkbox"/> Y <input type="checkbox"/> N |
| 14        |          | <input type="checkbox"/> Before <input type="checkbox"/> After | <input type="checkbox"/> HW <input type="checkbox"/> HR <input type="checkbox"/> None | <input type="checkbox"/> Y <input type="checkbox"/> N |
| 15        |          | <input type="checkbox"/> Before <input type="checkbox"/> After | <input type="checkbox"/> HW <input type="checkbox"/> HR <input type="checkbox"/> None | <input type="checkbox"/> Y <input type="checkbox"/> N |
| 16        |          | <input type="checkbox"/> Before <input type="checkbox"/> After | <input type="checkbox"/> HW <input type="checkbox"/> HR <input type="checkbox"/> None | <input type="checkbox"/> Y <input type="checkbox"/> N |
| 17        |          | <input type="checkbox"/> Before <input type="checkbox"/> After | <input type="checkbox"/> HW <input type="checkbox"/> HR <input type="checkbox"/> None | <input type="checkbox"/> Y <input type="checkbox"/> N |
| 18        |          | <input type="checkbox"/> Before <input type="checkbox"/> After | <input type="checkbox"/> HW <input type="checkbox"/> HR <input type="checkbox"/> None | <input type="checkbox"/> Y <input type="checkbox"/> N |
| 19        |          | <input type="checkbox"/> Before <input type="checkbox"/> After | <input type="checkbox"/> HW <input type="checkbox"/> HR <input type="checkbox"/> None | <input type="checkbox"/> Y <input type="checkbox"/> N |
| 20        |          | <input type="checkbox"/> Before <input type="checkbox"/> After | <input type="checkbox"/> HW <input type="checkbox"/> HR <input type="checkbox"/> None | <input type="checkbox"/> Y <input type="checkbox"/> N |
| 21        |          | <input type="checkbox"/> Before <input type="checkbox"/> After | <input type="checkbox"/> HW <input type="checkbox"/> HR <input type="checkbox"/> None | <input type="checkbox"/> Y <input type="checkbox"/> N |
| 22        |          | <input type="checkbox"/> Before <input type="checkbox"/> After | <input type="checkbox"/> HW <input type="checkbox"/> HR <input type="checkbox"/> None | <input type="checkbox"/> Y <input type="checkbox"/> N |
| 23        |          | <input type="checkbox"/> Before <input type="checkbox"/> After | <input type="checkbox"/> HW <input type="checkbox"/> HR <input type="checkbox"/> None | <input type="checkbox"/> Y <input type="checkbox"/> N |
| 24        |          | <input type="checkbox"/> Before <input type="checkbox"/> After | <input type="checkbox"/> HW <input type="checkbox"/> HR <input type="checkbox"/> None | <input type="checkbox"/> Y <input type="checkbox"/> N |
| 25        |          | <input type="checkbox"/> Before <input type="checkbox"/> After | <input type="checkbox"/> HW <input type="checkbox"/> HR <input type="checkbox"/> None | <input type="checkbox"/> Y <input type="checkbox"/> N |

| Date:     |          |                                                                |                                                                                       |                                                       |
|-----------|----------|----------------------------------------------------------------|---------------------------------------------------------------------------------------|-------------------------------------------------------|
| Location: |          |                                                                |                                                                                       |                                                       |
| #         | Position | Indication                                                     | Action                                                                                | Rounds                                                |
| 26        |          | <input type="checkbox"/> Before <input type="checkbox"/> After | <input type="checkbox"/> HW <input type="checkbox"/> HR <input type="checkbox"/> None | <input type="checkbox"/> Y <input type="checkbox"/> N |
| 27        |          | <input type="checkbox"/> Before <input type="checkbox"/> After | <input type="checkbox"/> HW <input type="checkbox"/> HR <input type="checkbox"/> None | <input type="checkbox"/> Y <input type="checkbox"/> N |
| 28        |          | <input type="checkbox"/> Before <input type="checkbox"/> After | <input type="checkbox"/> HW <input type="checkbox"/> HR <input type="checkbox"/> None | <input type="checkbox"/> Y <input type="checkbox"/> N |
| 29        |          | <input type="checkbox"/> Before <input type="checkbox"/> After | <input type="checkbox"/> HW <input type="checkbox"/> HR <input type="checkbox"/> None | <input type="checkbox"/> Y <input type="checkbox"/> N |
| 30        |          | <input type="checkbox"/> Before <input type="checkbox"/> After | <input type="checkbox"/> HW <input type="checkbox"/> HR <input type="checkbox"/> None | <input type="checkbox"/> Y <input type="checkbox"/> N |
| 31        |          | <input type="checkbox"/> Before <input type="checkbox"/> After | <input type="checkbox"/> HW <input type="checkbox"/> HR <input type="checkbox"/> None | <input type="checkbox"/> Y <input type="checkbox"/> N |
| 32        |          | <input type="checkbox"/> Before <input type="checkbox"/> After | <input type="checkbox"/> HW <input type="checkbox"/> HR <input type="checkbox"/> None | <input type="checkbox"/> Y <input type="checkbox"/> N |
| 33        |          | <input type="checkbox"/> Before <input type="checkbox"/> After | <input type="checkbox"/> HW <input type="checkbox"/> HR <input type="checkbox"/> None | <input type="checkbox"/> Y <input type="checkbox"/> N |
| 34        |          | <input type="checkbox"/> Before <input type="checkbox"/> After | <input type="checkbox"/> HW <input type="checkbox"/> HR <input type="checkbox"/> None | <input type="checkbox"/> Y <input type="checkbox"/> N |
| 35        |          | <input type="checkbox"/> Before <input type="checkbox"/> After | <input type="checkbox"/> HW <input type="checkbox"/> HR <input type="checkbox"/> None | <input type="checkbox"/> Y <input type="checkbox"/> N |
| 36        |          | <input type="checkbox"/> Before <input type="checkbox"/> After | <input type="checkbox"/> HW <input type="checkbox"/> HR <input type="checkbox"/> None | <input type="checkbox"/> Y <input type="checkbox"/> N |
| 37        |          | <input type="checkbox"/> Before <input type="checkbox"/> After | <input type="checkbox"/> HW <input type="checkbox"/> HR <input type="checkbox"/> None | <input type="checkbox"/> Y <input type="checkbox"/> N |
| 38        |          | <input type="checkbox"/> Before <input type="checkbox"/> After | <input type="checkbox"/> HW <input type="checkbox"/> HR <input type="checkbox"/> None | <input type="checkbox"/> Y <input type="checkbox"/> N |
| 39        |          | <input type="checkbox"/> Before <input type="checkbox"/> After | <input type="checkbox"/> HW <input type="checkbox"/> HR <input type="checkbox"/> None | <input type="checkbox"/> Y <input type="checkbox"/> N |
| 40        |          | <input type="checkbox"/> Before <input type="checkbox"/> After | <input type="checkbox"/> HW <input type="checkbox"/> HR <input type="checkbox"/> None | <input type="checkbox"/> Y <input type="checkbox"/> N |
| 41        |          | <input type="checkbox"/> Before <input type="checkbox"/> After | <input type="checkbox"/> HW <input type="checkbox"/> HR <input type="checkbox"/> None | <input type="checkbox"/> Y <input type="checkbox"/> N |
| 42        |          | <input type="checkbox"/> Before <input type="checkbox"/> After | <input type="checkbox"/> HW <input type="checkbox"/> HR <input type="checkbox"/> None | <input type="checkbox"/> Y <input type="checkbox"/> N |
| 43        |          | <input type="checkbox"/> Before <input type="checkbox"/> After | <input type="checkbox"/> HW <input type="checkbox"/> HR <input type="checkbox"/> None | <input type="checkbox"/> Y <input type="checkbox"/> N |
| 44        |          | <input type="checkbox"/> Before <input type="checkbox"/> After | <input type="checkbox"/> HW <input type="checkbox"/> HR <input type="checkbox"/> None | <input type="checkbox"/> Y <input type="checkbox"/> N |
| 45        |          | <input type="checkbox"/> Before <input type="checkbox"/> After | <input type="checkbox"/> HW <input type="checkbox"/> HR <input type="checkbox"/> None | <input type="checkbox"/> Y <input type="checkbox"/> N |
| 46        |          | <input type="checkbox"/> Before <input type="checkbox"/> After | <input type="checkbox"/> HW <input type="checkbox"/> HR <input type="checkbox"/> None | <input type="checkbox"/> Y <input type="checkbox"/> N |
| 47        |          | <input type="checkbox"/> Before <input type="checkbox"/> After | <input type="checkbox"/> HW <input type="checkbox"/> HR <input type="checkbox"/> None | <input type="checkbox"/> Y <input type="checkbox"/> N |
| 48        |          | <input type="checkbox"/> Before <input type="checkbox"/> After | <input type="checkbox"/> HW <input type="checkbox"/> HR <input type="checkbox"/> None | <input type="checkbox"/> Y <input type="checkbox"/> N |
| 49        |          | <input type="checkbox"/> Before <input type="checkbox"/> After | <input type="checkbox"/> HW <input type="checkbox"/> HR <input type="checkbox"/> None | <input type="checkbox"/> Y <input type="checkbox"/> N |
| 50        |          | <input type="checkbox"/> Before <input type="checkbox"/> After | <input type="checkbox"/> HW <input type="checkbox"/> HR <input type="checkbox"/> None | <input type="checkbox"/> Y <input type="checkbox"/> N |
