# Supplementary material for: Effectiveness of a multimodal hand hygiene campaign and obstacles to success in Addis Ababa, Ethiopia
Source: PubMed Central journal article supplement (PMC4004416; doi:10.1186/2047-2994-3-8), 2014-03-17
Supplement: 2047-2994-3-8-S2.pdf [file 2047-2994-3-8-S2.pdf]

HAVE **YOU** CLEANED YOUR HANDS?

HAVE YOU CLEANED YOUR HANDS?

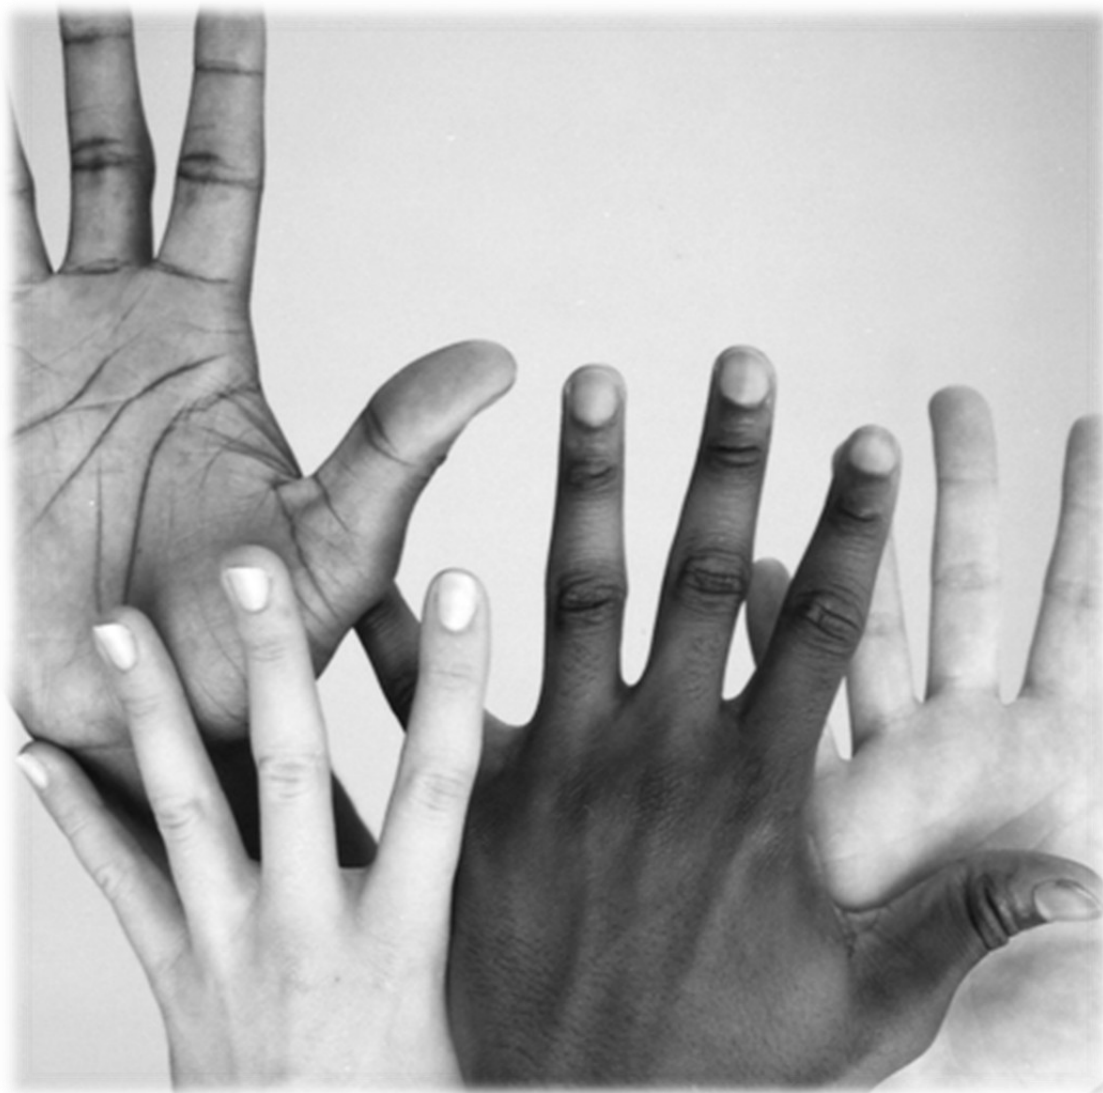

**HAND HYGIENE SAVES LIVES**

HAND HYGIENE SAVES LIVES
