# Supplementary material for: Effectiveness of a multimodal hand hygiene campaign and obstacles to success in Addis Ababa, Ethiopia
Source: PubMed Central journal article supplement (PMC4004416; doi:10.1186/2047-2994-3-8), 2014-03-17
Supplement: 2047-2994-3-8-S3.pdf [file 2047-2994-3-8-S3.pdf]

**Thank you for taking the time to complete this survey about hand hygiene. This is a completely anonymous survey, so please respond to each question as accurately and honestly as possible.**

**1. Over the past 3 months, have you received training about the importance of hand hygiene?**

- Yes
- No
- Do not know/unsure

|                                                                                                                | Not at all | Little | Somewhat | A Lot | A Great Deal |
|----------------------------------------------------------------------------------------------------------------|------------|--------|----------|-------|--------------|
| 2. To what extent did training improve your knowledge of the importance of hand hygiene for infection control? | 1          | 2      | 3        | 4     | 5            |
| 3. To what extent did training improve your understanding of when and how to perform hand hygiene?             | 1          | 2      | 3        | 4     | 5            |
| 4. To what extent did training increase your frequency of performing hand hygiene?                             | 1          | 2      | 3        | 4     | 5            |

**5. Do you have hand sanitizer in your possession at this time?**

- Yes
- No

**6. What difficulties have you faced in getting access to commercial sanitizer (Purell) over the past 2 months?**

**(Select all that apply)**

- Did not receive initial bottle of commercial (Purell) hand sanitizer
- Unable to get refill of commercial (Purell) hand sanitizer
- Lost original bottle of commercial (Purell) hand sanitizer
- No difficulties
- Other (please specify): \_\_\_\_\_

|                                                                        | Never | Rarely | Sometimes | Often | Always |
|------------------------------------------------------------------------|-------|--------|-----------|-------|--------|
| 7. How often do you clean your hands <i>prior</i> to eating a meal?    | 1     | 2      | 3         | 4     | 5      |
| 8. How often do you clean your hands <i>after</i> eating a meal?       | 1     | 2      | 3         | 4     | 5      |
| 9. How often do you clean your hands <i>after</i> toileting?           | 1     | 2      | 3         | 4     | 5      |
| 10. How often do you clean your hands <i>prior</i> to patient contact? | 1     | 2      | 3         | 4     | 5      |
| 11. How often do you clean your hands <i>after</i> patient contact?    | 1     | 2      | 3         | 4     | 5      |

| <b>When Using <u>Locally Produced (Purple) Sanitizer</u></b> | <b>Strongly Disagree</b> | <b>Disagree</b> | <b>Neutral</b> | <b>Agree</b> | <b>Strongly Agree</b> |
|--------------------------------------------------------------|--------------------------|-----------------|----------------|--------------|-----------------------|
| 12. APPEARANCE: My hand appear red, blotchy, or have a rash  | 1                        | 2               | 3              | 4            | 5                     |
| 13. MOISTURE: The skin on my hands becomes dry               | 1                        | 2               | 3              | 4            | 5                     |
| 14. SENSATION: My hands itch or burn                         | 1                        | 2               | 3              | 4            | 5                     |
| 15. INTACTNESS: There are abrasions or cracks on my hands    | 1                        | 2               | 3              | 4            | 5                     |

| <b>When Using <u>Commercial Sanitizer (Purell)</u></b>      | <b>Strongly Disagree</b> | <b>Disagree</b> | <b>Neutral</b> | <b>Agree</b> | <b>Strongly Agree</b> |
|-------------------------------------------------------------|--------------------------|-----------------|----------------|--------------|-----------------------|
| 16. APPEARANCE: My hand appear red, blotchy, or have a rash | 1                        | 2               | 3              | 4            | 5                     |
| 17. MOISTURE: The skin on my hands becomes dry              | 1                        | 2               | 3              | 4            | 5                     |
| 18. SENSATION: My hands itch or burn                        | 1                        | 2               | 3              | 4            | 5                     |
| 19. INTACTNESS: There are abrasions or cracks on my hands   | 1                        | 2               | 3              | 4            | 5                     |

| <b>COMPARISON: <u>Locally Produced and Commercial Sanitizer</u></b>                                                  | <b>Strongly Disagree</b> | <b>Disagree</b> | <b>Neutral</b> | <b>Agree</b> | <b>Strongly Agree</b> |
|----------------------------------------------------------------------------------------------------------------------|--------------------------|-----------------|----------------|--------------|-----------------------|
| 20. Commercial (Purell) hand sanitizer causes less skin irritation than the locally produced (purple) hand sanitizer | 1                        | 2               | 3              | 4            | 5                     |
| 21. I prefer the commercial (Purell) hand sanitizer over the locally produced (purple) hand sanitizer                | 1                        | 2               | 3              | 4            | 5                     |
| 22. I am more likely to clean my hands if I have commercial (Purell) hand sanitizer available.                       | 1                        | 2               | 3              | 4            | 5                     |

23. How old are you (in years)? \_\_\_\_\_ years old

24. What is your gender?

- Male       Female

25. What is your primary job title? (Check only one):

- Faculty physician       Resident physician       Medical Student/Intern  
 Nurse       Other (please specify): \_\_\_\_\_

26. What is your primary department? (Check only one):

- Medicine       Surgery       GYN/OBS  
 Pediatrics       Emergency       Other (please specify): \_\_\_\_\_
